# Supplementary material for: Enhancement of menaquinone- 7 production through immobilization with hydrogel-based porous membranes
Source: Springer Nature journal article supplement (doi:10.1007/s00253-025-13493-3), 2025-05-13
Supplement: MOESM1 [file 253_2025_13493_MOESM1_ESM.pdf]

## Supporting Information

### **Enhancement of menaquinone-7 production through immobilization with hydrogel-based porous membranes**

#### **Authors:**

Qiu-Hua Zhang,<sup>†,‡</sup> Zheng Wang,<sup>†</sup> Yao-Qiang Wang,<sup>†</sup> Man-Lu Liu,<sup>†</sup> and Hai-Jia Su<sup>†,\*</sup>

#### **Affiliations:**

<sup>†</sup>Beijing Key Laboratory of Bioprocess, and Beijing Advanced Innovation Center for Soft Matter Science and Engineering, Beijing University of Chemical Technology, Beijing, 100029, People's Republic of China.

<sup>‡</sup>Brother research center, Jiangxi Brother Pharmaceutical Co.,LTD, Jiujiang, 332700, People's Republic of China.

#### **\*Corresponding author:**

Prof. Haijia Su, E-mail: suhj@mail.buct.edu.cn  
Qiu-Hua Zhang, E-mail: 360024848@qq.com

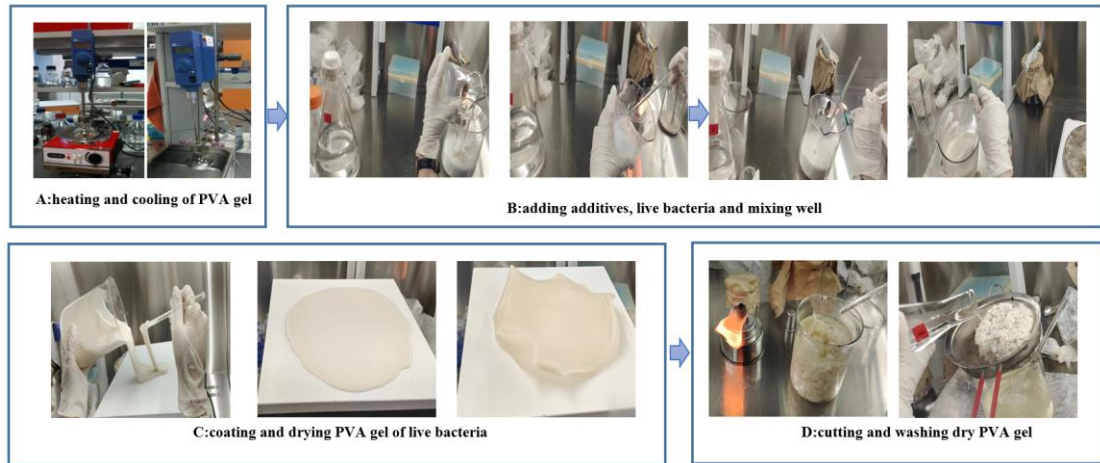

**Figure. S1** The flowchart for the immobilization process.

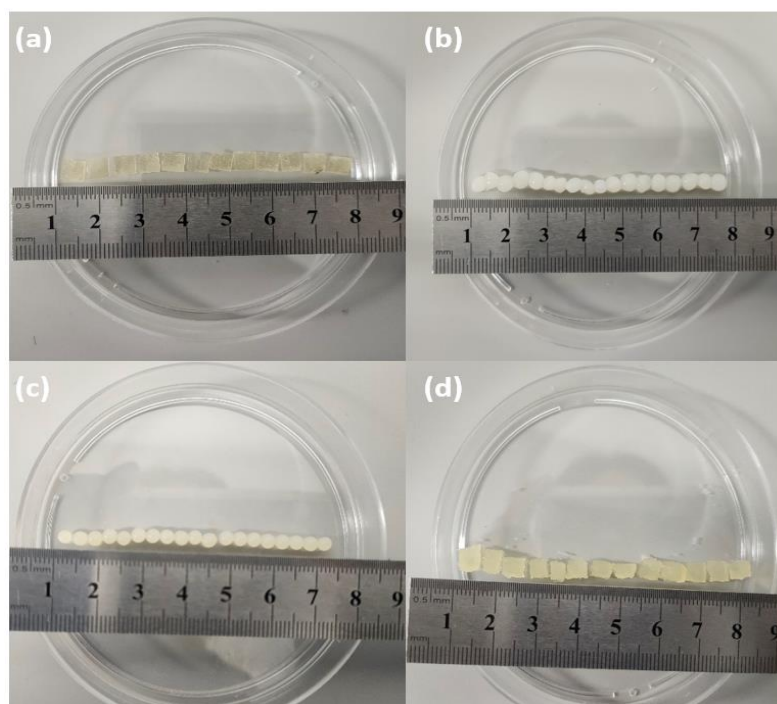

**Figure. S2** Immobilized cells with different ma: Poly viny alcohol (a); Chitosan (b); Alginate (c); Gelatin (d).

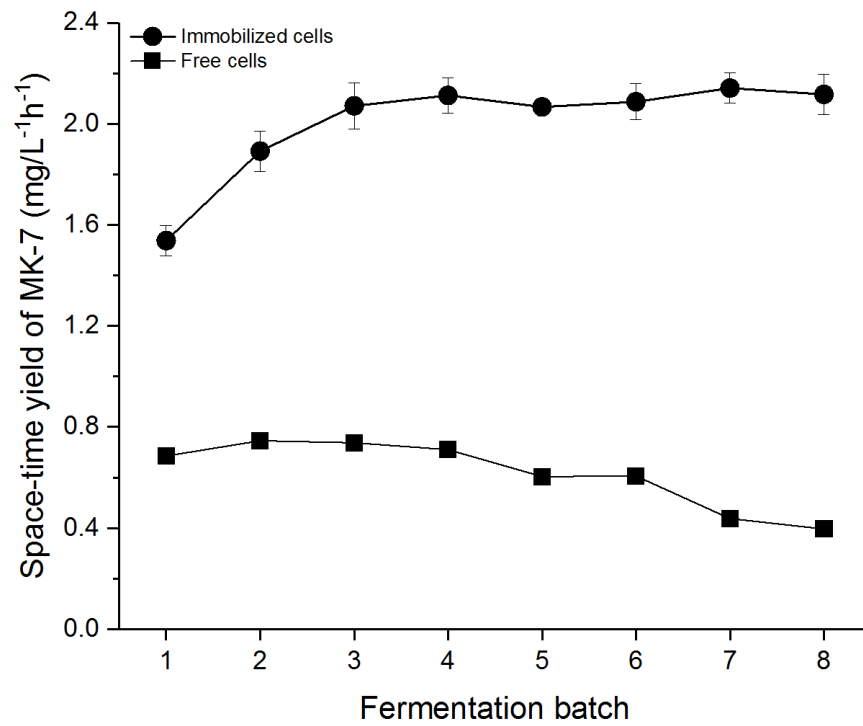

**Figure. S3** Comparison of the space-time yields of MK-7 using free cells (square symbol) and immobilized cells (circle symbol) in continuous fermentation processes.



**Table S1.** MK-7 production, final OD<sub>600</sub>, maximal specific growth rate ( $\mu_{\max}$ ) and maximal glycerol consumption rate ( $q_{s,\max}$ ) of *Bacillus subtilis* BUCT-184 strains during cultivation in 5L bioreactor.

| Cells             | Final OD <sub>600</sub> | $\mu_{\max}$ (h <sup>-1</sup> ) <sup>a</sup> | $q_{s,\max}$ (mg OD <sub>600</sub> <sup>-1</sup> h <sup>-1</sup> ) | MK-7 yield (μg(g DCW) <sup>-1</sup> ) | Specific activity of menA <sup>b</sup> |
|-------------------|-------------------------|----------------------------------------------|--------------------------------------------------------------------|---------------------------------------|----------------------------------------|
| Immobilized cells | 16.77±0.55              | 1.45±0.15                                    | 32.2±3.2                                                           | 161.1±8.2                             | 0.67±0.12                              |
| Free cells        | 18.78±0.59              | 0.73±0.09                                    | 23.1±1.2                                                           | 109.2±13.3                            | 0.65±0.24                              |

a, ΔOD<sub>600</sub> per units of bacteria per hour.

b, the unit of specific activity is nanomoles per hour per milligram of protein.
